# Supplementary material for: Synthesis and characterization of cobalt(iii) complexes containing 2-pyridinecarboxamide ligands and their application in catalytic oxidation of ethylbenzene with dioxygenElectronic supplementary information (ESI) available: full experimental and spectroscopic data for all compounds. See http://www.rsc.org/suppdata/cc/b3/b301963b/
Source: Royal Society of Chemistry journal article supplement (doi:10.1039/b301963b), 2003-05-07
Supplement: b301963b.doc [file b301963b.doc]

Synthesis and Characterization of Cobalt (III) Complexes Containing 2-Pyridinecarboxamide Ligands and Their Application in Catalytic Oxidation of Ethylbenzene with Dioxygen

Jian-Ying Qi,ab Hong-Xia Ma,a Xian-Jun Li,a [[1]](#footnote-2) Zhong-Yuan Zhou,b Michael C. K. Choi b

Albert S. C. Chanb [[2]](#footnote-3) and Qi-Yun Yang c

a Department of Chemistry, Sichuan University, Chengdu, China. Tel: 86 28 5412904

b Open Laboratory of Chirotechnology of the Institute of Molecular Technology for Drug Discovery and Synthesis and Department of Applied Biology and Chemical Technology, The Hong Kong Polytechnic University, Hong Kong, China. Fax:852 23649932; Tel: 852 27665607; E-mail: bcachan@polyu.edu.hk

c Department of Chemistry, Changsha University of Electric Power, Hunan, China. Tel: 86 731 2617338.

**SUPPORTING INFORMATION**

# Experimental Section

**Regents and Instruments.** All chemicals and solvents used in synthesis were of regent grade and used without further purification unless state otherwise. Tetrahydrofuran was refluxed with Na and distilled.

Spectroscopic studies were carried out by UV240 or DX.17MV UV-VIS, FT-IR16PC infrared and Varian-500 NMR 1H spectrometers with DMSO- *d*6 and TMS as solvent and internal standard. Molecular structure was determined by Bruker CCD area detector diffractometer. Elemental analysis was determined by Vario elemental analytical service. The products of ethylbenzene oxidation were analyzed by 4890 gas chromatograph (FID) with 3395 integrating meter. Melting point were recorded on a BUCHI Melting Point B-545 apparatus and uncorrected.

**Synthesis of Cobalt (III) Complexes15 5-8.** To a solution of CoCl2.6H2O (180 mg, 0.76 mmol) in H2O (2 ml) was added 25% NH3 (3 ml), and pyridinecarboxamide ligand (1.52 mmol) in EtOH or MeOH (5 ml). The mixture was heated to 50 C for 1h, filtered and washed with H2O and methanol or ethanol. Red-brown sediment resulted on drying. The structures of complexes **6-8** were confirmed by X-ray single crystallographic analysis. The yields of complexes **5-8** were 81%, 50%, 61% and 68%, respectively.

**General Procedure in Ethylbenzene Oxidation**. Ethylbenzene (1 ml) and catalyst (0.510-3-610-3 mol·L-1) were added into an 25 ml autoclave, exchanged three times with pure oxygen, then filled with O2 to 0.8106-3.2106 Pa, stirred and heated to 120-160 C for a period of 2-10 h. The resultant liquid was taken out and analyzed by GC after cooled to room temperature.

# Spectroscopic Data

# Table 1. UV adsorption spectrum data of the

# ligands and cobalt complexes (nm)

| ligand | Major peak | complex | Major peak |
| --- | --- | --- | --- |
| 1 | 284 | 5 | 304, 288, 270 |
| 2 | 298 | 6 | 360, 290, 271 |
| 3 | 289 | 7 | 311, 270, |
| 4 | 287 | 8 | 313, 265 |

# Table 2. IR absorption wave number of ligands and metal complexes (cm-1)

| ligand or complex | OH  (H2O) | N-H | Ar,  C-H | CH3(CH2),C-H | C=O | Ar,  C=C | C-N | Ar a | Arb | C-Cl |
| --- | --- | --- | --- | --- | --- | --- | --- | --- | --- | --- |
| 1 |  | 3334 | 3090 |  | 1670 | 1598  1530 | 1320 | 814,680 | 756 |  |
| 5 | 3434 |  | 3059 |  | 1620 | 1597  1588 | 1294 | 757,707 | 766 |  |
| 2 |  | 3355 | 3100 | 2990  2850 | 1682 | 1590  1536 | 1315 |  | 753  826 |  |
| 6 | 3402 |  | 3086 | 2964  2822 | 1622 | 1594  1502 | 1288 |  | 762  824 |  |
| 3 |  | 3336 | 3040 | 2960  2856 | 1677 | 1588  1522 | 1320 |  | 743  810 |  |
| 7 | 3401 |  | 3054 | 2937  2884 | 1636 | 1592  1506 | 1298 |  | 764  810 |  |
| 4 |  | 3330 | 3044 |  | 1684 | 1590  1522 | 1394 |  | 742  828 | 709  635 |
| 8 | 3446 |  | 3036 |  | 1636 | 1598  1570 | 1294 |  | 766  818 | 735  688 |

1. monosubstitute on the aryl-ring, b. 1,4-disubstitute on the aryl-ring.

# Table 3. 1H NMR data of the metal complexes (, ppm)

| Complex | Pyridyl H | Phenyl H | Alkyl H |
| --- | --- | --- | --- |
| 5 | 8.979-7.367(m, 12H) | 7.154-6.629(m, 15H) | - |
| 6 | 8.942-7.303(m, 12H) | 6.798-6.224(m,12H) | 3.684(s, 3H), 3.572(s, 3H), .3.498(s, 3H) |
| 7 | 8.952-7.307(m, 12H) | 6.922-6.443(m, 12H) | 2.188(d, 3H, J=8Hz), 2.019(d, 3H, J=8.5Hz),  1.920(d, H,J=8.5Hz) |
| 8 | 8.888-7.414(m, 12H) | 7.179-6.750(m,12H) | - |

**Table 4**. Data of elemental analysis of metal complexes

| Complex | Formula | C | | H | | N | |
| --- | --- | --- | --- | --- | --- | --- | --- |
| Found | Calcd. | found | Calcd. | found | Calcd. |
| 5 | CoC36H29N6O4 | 63.00 | 64.67 | 4.34 | 4.37 | 12.34 | 12.57 |
| 6 | CoC39H35N6O7 | 61.82 | 61.74 | 4.66 | 4.65 | 11.16 | 11.08 |
| 7 a | CoC39H33N6O3 | 67.15 | 67.63 | 4.72 | 4.80 | 12.14 | 12.13 |
| 8 | CoC36H28Cl3N6O5 | 53.93 | 54.73 | 3.48 | 3.57 | 10.59 | 10.64 |

1. Calculated not including combined water after the sample was treated at 100 C in

vacuum for 4 h.

1.  [↑](#footnote-ref-2)
2.  To whom correspondence should be addressed. Email: [bcachan@polyu.edu.hk](mailto:bcyli@polyu.edu..hk) [↑](#footnote-ref-3)
